# Supplementary material for: Liquid Biopsy in Gastric Cancer: Analysis of Somatic Cancer Tissue Mutations in Plasma Cell-Free DNA for Predicting Disease State and Patient Survival
Source: PubMed Central journal article supplement (PMC8462609; doi:10.14309/ctg.0000000000000403), 2021-09-24
Supplement: ct9-12-e00403-s001.pdf [file ct9-12-e00403-s001.pdf]

**Supplementary table 1. Patient information**

| Sample | TNM          | Differentiation grade | Type                       | Lauren classification | TMB*   | Gender | Age | MSI status** | CA19.9 | CEA    | CA72.4 |
|--------|--------------|-----------------------|----------------------------|-----------------------|--------|--------|-----|--------------|--------|--------|--------|
| I00650 | T1b, N2, M0  | G3                    | Adenocarcinoma             | Intestinal            | 95.128 | M      | 66  | Positive     | -      | 803.73 | 0.60   |
| I00633 | T1b, N2, M0  | G2                    | Papillary adenocarcinoma   | Intestinal            | 13.846 | M      | 75  | Negative     | -      | 437.91 | 1.07   |
| I00639 | T1b, N0, M0  | G2                    | Adenocarcinoma             | Intestinal            | 8.205  | M      | 81  | Negative     | -      | 295.65 | 1.03   |
| I00641 | Tx, Nx, M1   | G3                    | Carcinoma                  | Diffuse               | 11.026 | M      | 72  | Negative     | 354.54 | 734.14 | 3.59   |
| I00646 | T2, N1, M0   | G3                    | Adenocarcinoma             | Diffuse               | 9.231  | M      | 51  | Negative     | -      | 969.55 | 1.40   |
| I00631 | T2, N0, M0   | G3                    | Adenocarcinoma             | Diffuse               | 13.846 | F      | 43  | Negative     | -      | 508.45 | 2.29   |
| I00630 | T2, N3a, M0  | G3                    | Adenocarcinoma             | Indeterminate         | 58.462 | M      | 86  | Negative     | 138.99 | 611.71 | 0.96   |
| I00654 | T2, N3, M1   | G3                    | Adenocarcinoma             | Diffuse               | 12.821 | M      | 75  | Negative     | -      | 568.60 | 0.77   |
| I00634 | T2, N0, M0   | G2                    | Adenocarcinoma             | Intestinal            | 10.769 | M      | 63  | Negative     | -      | 438.41 | 0.51   |
| I00640 | T2, N0, M1   | unknown               | Adenocarcinoma             | Diffuse               | 10.513 | F      | 42  | Negative     | -      | 577.59 | 0.62   |
| I00649 | T3, N0, M0   | G2                    | Adenocarcinoma             | Intestinal            | 10.769 | M      | 55  | Negative     | -      | 546.86 | 0.64   |
| I00647 | T3, N3, M1   | G3                    | Adenocarcinoma             | Indeterminate         | 67.179 | M      | 85  | Positive     | -      | 825.42 | 0.73   |
| I00655 | T3, N2, M1   | G2                    | Adenocarcinoma             | Intestinal            | 7.436  | M      | 53  | Negative     | -      | 656.27 | 0.48   |
| I00632 | T3, N3a, M0  | G2                    | Adenocarcinoma             | Intestinal            | 97.436 | M      | 63  | Positive     | -      | 409.79 | 1.16   |
| I00644 | T3, N2, M1   | G2                    | Adenocarcinoma             | Intestinal            | 10.769 | F      | 77  | Negative     | -      | 565.33 | 1.13   |
| I00643 | T3, N1, M0   | unknown               | Carcinoma                  | unknown               | 12.308 | F      | 72  | Negative     | -      | 666.97 | 1.23   |
| I00638 | T3, N0, M0   | unknown               | Signet ring cell carcinoma | Diffuse               | 11.026 | M      | 70  | Negative     | -      | 335.73 | 0.55   |
| I00635 | T3, N2, M0   | G2                    | Adenocarcinoma             | Diffuse               | 8.462  | M      | 72  | Negative     | -      | 365.24 | 4.36   |
| I00653 | T4a, N3b, M0 | G3                    | Adenocarcinoma             | Intestinal            | 20.256 | F      | 77  | Negative     | 49.83  | 964.26 | 1.15   |
| I00642 | T4, N1, Mx   | G3                    | Adenocarcinoma             | Diffuse               | 14.359 | M      | 62  | Negative     | -      | 379.02 | 1.31   |
| I00658 | T4a, N2, M0  | G2                    | adenocarcinoma             | Intestinal            | 13.590 | M      | 81  | Negative     | 118.51 | 574.91 | 1.14   |
| I00651 | T4a, N3a, M1 | G3                    | Adenocarcinoma             | Intestinal            | 12.821 | M      | 80  | Negative     | -      | 596.86 | 0.98   |
| I00652 | T4b, N3b, M0 | G2                    | Adenocarcinoma             | Intestinal            | 12.564 | M      | 67  | Negative     | 10.41  | 689.79 | 0.88   |
| I00645 | T4, N1, M1   | G2                    | Adenocarcinoma             | Intestinal            | 12.564 | M      | 72  | Negative     | -      | 571.65 | 0.58   |
| I00636 | T4, N3, M1   | G2                    | Adenocarcinoma             | Intestinal            | 14.103 | F      | 77  | Negative     | -      | 242.37 | 1.43   |
| I00657 | T4b, N3, M1  | G3                    | Adenocarcinoma             | Diffuse               | 78.462 | M      | 85  | Negative     | -      | 342.80 | 0.56   |
| I00656 | T4b, N3b, M1 | G3                    | Adenocarcinoma             | Diffuse               | 11.795 | F      | 66  | Negative     | 30.41  | 536.01 | 0.77   |
| I00629 | unknown      | unknown               | Adenocarcinoma             | unknown               | 9.744  | M      | 65  | Negative     | -      | 432.97 | 0.89   |

\* Tumor mutational burden (the number of somatic mutations in the coding region per megabase (Mb), including SNVs and small INDELS )

\*\* Microsatellite instability from WES data was evaluated using MSIsensor (Niu B, et al. *Bioinformatics* , 2014).
