# Supplementary material for: Liquid Biopsy in Gastric Cancer: Analysis of Somatic Cancer Tissue Mutations in Plasma Cell-Free DNA for Predicting Disease State and Patient Survival
Source: PubMed Central journal article supplement (PMC8462609; doi:10.14309/ctg.0000000000000403), 2021-09-24
Supplement: ct9-12-e00403-s002.pdf [file ct9-12-e00403-s002.pdf]

**Supplementary table 2.** Genes covered by custom targeted NGS panel

|        |        |       |       |        |       |       |       |
|--------|--------|-------|-------|--------|-------|-------|-------|
| ACVR2A | CDH1   | ERBB4 | GLI3  | MSH6   | PREX2 | SYNE1 | TRRAP |
| APC    | CTNNB1 | FAT1  | KMT2C | MUC16  | PTEN  | SMAD4 | ZIC4  |
| ARID1A | EGFR   | FAT4  | KRAS  | PBRM1  | RHOA  | SPEN  | TTN   |
| ATM    | EPHB1  | FBXW7 | MACF1 | PIK3CA | RIMS2 | STK11 |       |
| CCND1  | ERBB2  | FHIT  | MLH1  | PKHD1  | RNF43 | TP53  |       |
