# Supplementary material for: Liquid Biopsy in Gastric Cancer: Analysis of Somatic Cancer Tissue Mutations in Plasma Cell-Free DNA for Predicting Disease State and Patient Survival
Source: PubMed Central journal article supplement (PMC8462609; doi:10.14309/ctg.0000000000000403), 2021-09-24
Supplement: ct9-12-e00403-s003.pdf [file ct9-12-e00403-s003.pdf]

**Supplementary table 3. Sequencing metrics**

| Source        | Sample name | Read length | Reads    | Target territory | On target bases | Portion target covered<br>10x* or 100x†<br>(%) | Mean target coverage |
|---------------|-------------|-------------|----------|------------------|-----------------|------------------------------------------------|----------------------|
| Tumour tissue | I00629      | 100         | 40282864 | 38874504         | 2534031537      | 98.10%                                         | 65                   |
| Tumour tissue | I00630      | 100         | 31793768 | 38874504         | 1923669778      | 97.20%                                         | 49                   |
| Tumour tissue | I00631      | 100         | 39598528 | 38874504         | 2328821716      | 96.80%                                         | 60                   |
| Tumour tissue | I00632      | 100         | 44277250 | 38874504         | 2712705244      | 98.40%                                         | 70                   |
| Tumour tissue | I00633      | 100         | 52243412 | 38874504         | 3267217748      | 98.60%                                         | 84                   |
| Tumour tissue | I00634      | 100         | 41528506 | 38874504         | 2602067809      | 98.00%                                         | 67                   |
| Tumour tissue | I00635      | 100         | 29021988 | 38874504         | 1805218890      | 97.10%                                         | 46                   |
| Tumour tissue | I00636      | 100         | 57057806 | 38874504         | 3505903349      | 98.20%                                         | 90                   |
| Tumour tissue | I00637      | 100         | 66056844 | 38874504         | 4019258359      | 98.60%                                         | 103                  |
| Tumour tissue | I00638      | 100         | 52748112 | 38874504         | 3185813494      | 98.50%                                         | 82                   |
| Tumour tissue | I00639      | 100         | 47417780 | 38874504         | 2868093696      | 98.40%                                         | 74                   |
| Tumour tissue | I00640      | 100         | 59901720 | 38874504         | 3680985270      | 98.70%                                         | 95                   |
| Tumour tissue | I00641      | 100         | 54574638 | 38874504         | 3341487397      | 98.60%                                         | 86                   |
| Tumour tissue | I00642      | 100         | 48512136 | 38874504         | 2978437474      | 98.60%                                         | 77                   |
| Tumour tissue | I00643      | 100         | 49245172 | 38874504         | 2993808093      | 98.50%                                         | 77                   |
| Tumour tissue | I00644      | 100         | 52252224 | 38874504         | 3251594301      | 98.40%                                         | 84                   |
| Tumour tissue | I00645      | 100         | 51955968 | 38874504         | 3171732979      | 98.60%                                         | 82                   |
| Tumour tissue | I00646      | 100         | 49152368 | 38874504         | 2973362959      | 98.50%                                         | 76                   |
| Tumour tissue | I00647      | 100         | 47537862 | 38874504         | 2918408751      | 98.30%                                         | 75                   |
| Tumour tissue | I00648      | 100         | 35807900 | 38874504         | 2194361622      | 98.00%                                         | 56                   |
| Tumour tissue | I00649      | 100         | 42305166 | 38874504         | 2595176666      | 98.20%                                         | 67                   |
| Tumour tissue | I00650      | 100         | 36842672 | 38874504         | 2270969470      | 97.80%                                         | 58                   |
| Tumour tissue | I00651      | 100         | 45690082 | 38874504         | 2825309984      | 98.40%                                         | 73                   |
| Tumour tissue | I00652      | 100         | 50803038 | 38874504         | 3035561975      | 98.50%                                         | 78                   |
| Tumour tissue | I00653      | 100         | 60651446 | 38874504         | 3806432054      | 98.50%                                         | 98                   |
| Tumour tissue | I00654      | 100         | 42497178 | 38874504         | 2586339479      | 98.40%                                         | 67                   |
| Tumour tissue | I00655      | 100         | 38664244 | 38874504         | 2367687329      | 98.10%                                         | 61                   |
| Tumour tissue | I00656      | 100         | 51980522 | 38874504         | 3201771097      | 98.60%                                         | 82                   |
| Tumour tissue | I00657      | 100         | 48364582 | 38874504         | 2929082393      | 98.40%                                         | 75                   |
| Tumour tissue | I00658      | 100         | 43693546 | 38874504         | 2686808383      | 98.30%                                         | 69                   |
| Normal WBC    | I00629      | 100         | 56456258 | 38874504         | 3495483961      | 98.60%                                         | 90                   |
| Normal WBC    | I00630      | 100         | 47463474 | 38874504         | 2954279668      | 98.50%                                         | 76                   |
| Normal WBC    | I00631      | 100         | 53920518 | 38874504         | 3335393834      | 98.60%                                         | 86                   |
| Normal WBC    | I00632      | 100         | 38211594 | 38874504         | 2228233776      | 97.80%                                         | 57                   |
| Normal WBC    | I00633      | 100         | 52163908 | 38874504         | 3273091119      | 98.60%                                         | 84                   |
| Normal WBC    | I00634      | 100         | 45216158 | 38874504         | 2871445225      | 98.50%                                         | 74                   |
| Normal WBC    | I00635      | 100         | 43097730 | 38874504         | 2657192522      | 98.10%                                         | 68                   |
| Normal WBC    | I00636      | 100         | 66800050 | 38874504         | 4114774092      | 98.50%                                         | 106                  |
| Normal WBC    | I00637      | 100         | 43289140 | 38874504         | 2653395975      | 98.30%                                         | 68                   |
| Normal WBC    | I00638      | 100         | 46504658 | 38874504         | 2845735052      | 98.40%                                         | 73                   |
| Normal WBC    | I00639      | 100         | 48598028 | 38874504         | 2935161434      | 98.50%                                         | 76                   |
| Normal WBC    | I00640      | 100         | 51267144 | 38874504         | 3066913932      | 98.60%                                         | 79                   |
| Normal WBC    | I00641      | 100         | 43191772 | 38874504         | 2624641535      | 98.30%                                         | 68                   |
| Normal WBC    | I00642      | 100         | 44977858 | 38874504         | 2770424349      | 98.40%                                         | 71                   |

|              |               |     |            |          |             |        |        |
|--------------|---------------|-----|------------|----------|-------------|--------|--------|
| Normal WBC   | <b>I00643</b> | 100 | 48426042   | 38874504 | 2931406618  | 98.40% | 75     |
| Normal WBC   | <b>I00644</b> | 100 | 45151842   | 38874504 | 2784669586  | 98.40% | 72     |
| Normal WBC   | <b>I00645</b> | 100 | 49024916   | 38874504 | 2974346165  | 98.50% | 77     |
| Normal WBC   | <b>I00646</b> | 100 | 52248042   | 38874504 | 3182211080  | 98.60% | 82     |
| Normal WBC   | <b>I00647</b> | 100 | 62326708   | 38874504 | 3781696050  | 98.70% | 97     |
| Normal WBC   | <b>I00648</b> | 100 | 51640638   | 38874504 | 3188232921  | 98.60% | 82     |
| Normal WBC   | <b>I00649</b> | 100 | 44743838   | 38874504 | 2757079391  | 98.40% | 71     |
| Normal WBC   | <b>I00650</b> | 100 | 53467836   | 38874504 | 3271383055  | 98.60% | 84     |
| Normal WBC   | <b>I00651</b> | 100 | 44500884   | 38874504 | 2715131453  | 98.20% | 70     |
| Normal WBC   | <b>I00652</b> | 100 | 45628850   | 38874504 | 2820255777  | 98.40% | 73     |
| Normal WBC   | <b>I00653</b> | 100 | 40348852   | 38874504 | 2481130499  | 98.20% | 64     |
| Normal WBC   | <b>I00654</b> | 100 | 43352030   | 38874504 | 2671553880  | 98.40% | 69     |
| Normal WBC   | <b>I00655</b> | 100 | 38446290   | 38874504 | 2340708622  | 98.00% | 60     |
| Normal WBC   | <b>I00656</b> | 100 | 48637704   | 38874504 | 2992454223  | 98.50% | 77     |
| Normal WBC   | <b>I00657</b> | 100 | 54253562   | 38874504 | 3301333816  | 98.50% | 85     |
| Normal WBC   | <b>I00658</b> | 100 | 41176270   | 38874504 | 2477256642  | 98.10% | 64     |
| Plasma cfDNA | <b>I00629</b> | 150 | 1925440020 | 389683   | 96078373757 | 99.80% | 246555 |
| Plasma cfDNA | <b>I00630</b> | 150 | 116677368  | 389683   | 3194464607  | 99.70% | 8198   |
| Plasma cfDNA | <b>I00631</b> | 150 | 88608160   | 389683   | 2834064800  | 99.80% | 7273   |
| Plasma cfDNA | <b>I00632</b> | 150 | 526775610  | 389683   | 25420655512 | 99.80% | 65234  |
| Plasma cfDNA | <b>I00633</b> | 150 | 588213838  | 389683   | 27556496287 | 99.80% | 70715  |
| Plasma cfDNA | <b>I00634</b> | 150 | 54063944   | 389683   | 1296533761  | 99.70% | 3327   |
| Plasma cfDNA | <b>I00636</b> | 150 | 149282498  | 389683   | 6228095221  | 99.80% | 15982  |
| Plasma cfDNA | <b>I00637</b> | 150 | 215892490  | 389683   | 5943799631  | 99.70% | 15253  |
| Plasma cfDNA | <b>I00638</b> | 150 | 213537244  | 389683   | 9676295448  | 99.90% | 24831  |
| Plasma cfDNA | <b>I00639</b> | 150 | 89747974   | 389683   | 2243659177  | 99.60% | 5758   |
| Plasma cfDNA | <b>I00642</b> | 150 | 943467732  | 389683   | 46908613955 | 99.80% | 120376 |
| Plasma cfDNA | <b>I00643</b> | 150 | 363844884  | 389683   | 17479661439 | 99.90% | 44856  |
| Plasma cfDNA | <b>I00645</b> | 150 | 120693718  | 389683   | 10640482906 | 99.80% | 27305  |
| Plasma cfDNA | <b>I00647</b> | 150 | 113182792  | 389683   | 3216035249  | 99.70% | 8253   |
| Plasma cfDNA | <b>I00648</b> | 150 | 89996208   | 389683   | 2526096799  | 99.70% | 6482   |
| Plasma cfDNA | <b>I00649</b> | 150 | 258635882  | 389683   | 11959911073 | 99.80% | 30691  |
| Plasma cfDNA | <b>I00650</b> | 150 | 69343174   | 389683   | 1575012955  | 99.60% | 4042   |
| Plasma cfDNA | <b>I00651</b> | 150 | 128449582  | 389683   | 3458995901  | 99.70% | 8876   |
| Plasma cfDNA | <b>I00652</b> | 150 | 98132034   | 389683   | 2552281293  | 99.70% | 6550   |
| Plasma cfDNA | <b>I00653</b> | 150 | 93471852   | 389683   | 2536023493  | 99.70% | 6508   |
| Plasma cfDNA | <b>I00654</b> | 150 | 131092308  | 389683   | 3532523097  | 99.80% | 9065   |
| Plasma cfDNA | <b>I00657</b> | 150 | 165396142  | 389683   | 6991019337  | 99.80% | 17940  |
| Plasma cfDNA | <b>I00658</b> | 150 | 201540666  | 389683   | 8775071375  | 99.80% | 22518  |

\* - for tumour tissue and matching normal WBC samples; † - for plasma cfDNA samples.
