# Supplementary material for: Liquid Biopsy in Gastric Cancer: Analysis of Somatic Cancer Tissue Mutations in Plasma Cell-Free DNA for Predicting Disease State and Patient Survival
Source: PubMed Central journal article supplement (PMC8462609; doi:10.14309/ctg.0000000000000403), 2021-09-24
Supplement: ct9-12-e00403-s004.pdf [file ct9-12-e00403-s004.pdf]

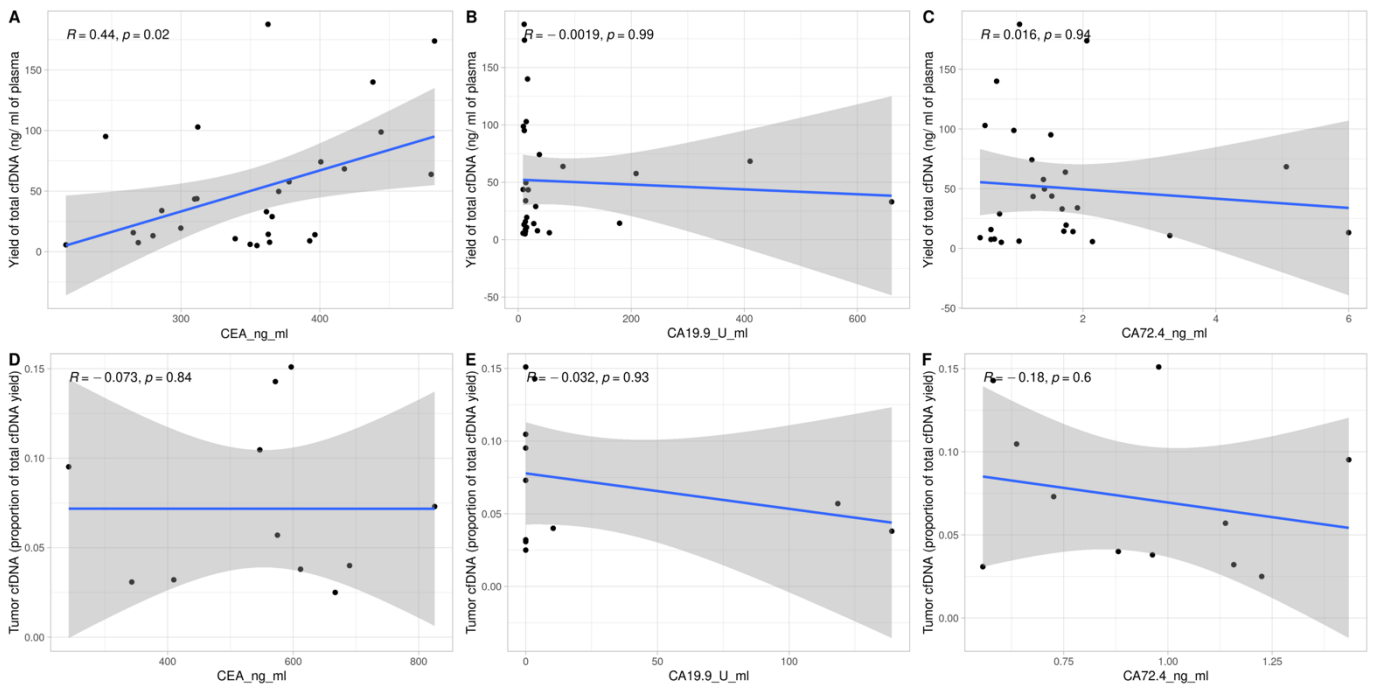

**Supplementary Figure 1.** Spearman's correlation analysis between level of oncoproteins CEA, CA 19-9, CA 72-4 (x-axis), and total circulating cfDNA (a-c) and tumor derived cfDNA yield (d-f). Moderate positive correlation was determined between levels of CEA (ng/ml) and total cfDNA yield ( $R = 0.44, p = 0.02$ )
