# Supplementary material for: Liquid Biopsy in Gastric Cancer: Analysis of Somatic Cancer Tissue Mutations in Plasma Cell-Free DNA for Predicting Disease State and Patient Survival
Source: PubMed Central journal article supplement (PMC8462609; doi:10.14309/ctg.0000000000000403), 2021-09-24
Supplement: ct9-12-e00403-s005.pdf [file ct9-12-e00403-s005.pdf]

**A**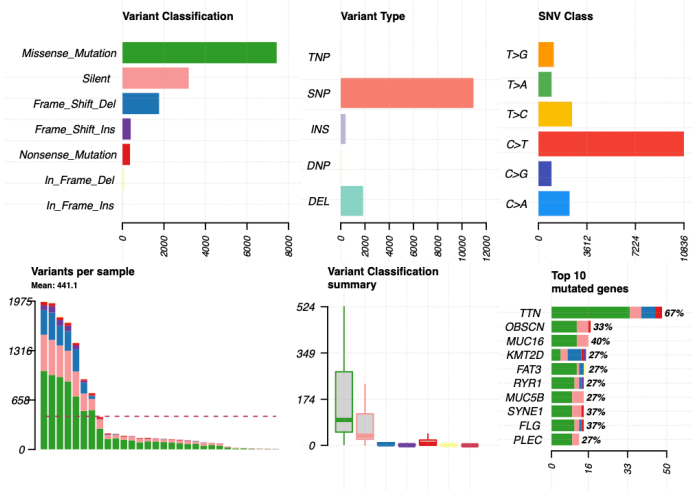**B**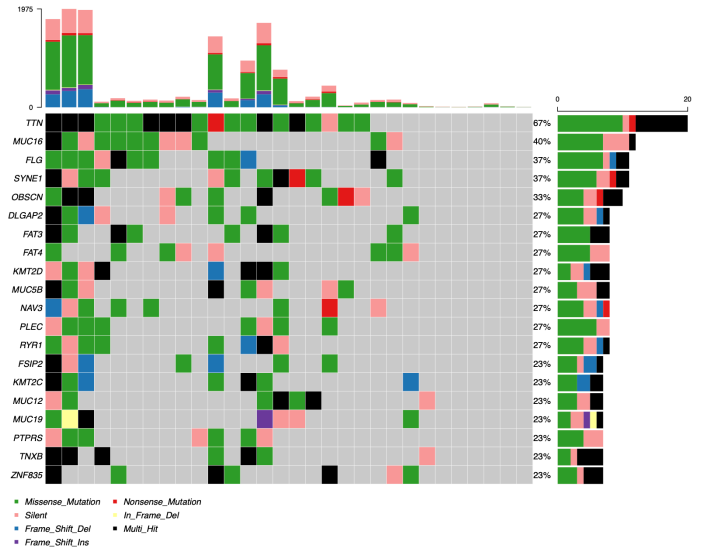

**Supplementary Figure 2.** Summary of mutational spectra (whole exome sequencing) in GC tissue samples. **a** Summary of mutational spectra (whole exome sequencing) in GC tissue samples including variant classification, variant type, SNV class, variants per sample, variants classification summary and top 10 mutated genes; **b** oncoplot of mutated genes in GC tissue samples
