# Supplementary material for: Liquid Biopsy in Gastric Cancer: Analysis of Somatic Cancer Tissue Mutations in Plasma Cell-Free DNA for Predicting Disease State and Patient Survival
Source: PubMed Central journal article supplement (PMC8462609; doi:10.14309/ctg.0000000000000403), 2021-09-24
Supplement: ct9-12-e00403-s006.pdf [file ct9-12-e00403-s006.pdf]

**Supplementary table 4. Somatic mutations in GC tissue samples**

| Sample name | Gene   | cHGVS                                    | pHGVS         | Transcript     | Variant classification | Chr | Start     | End       | REF | ALT           |
|-------------|--------|------------------------------------------|---------------|----------------|------------------------|-----|-----------|-----------|-----|---------------|
| I00629      | MUC16  | c.7248C>T                                | p.Pro2416Pro  | NM_024690.2    | Silent                 | 19  | 9084567   | 9084567   | G   | A             |
| I00629      | FAT4   | c.1114C>G                                | p.Gln372Glu   | NM_001291303.1 | Missense_Mutation      | 4   | 126238680 | 126238680 | C   | G             |
| I00629      | SYNE1  | c.11533C>A                               | p.Pro3845Thr  | NM_182961.3    | Missense_Mutation      | 6   | 152673209 | 152673209 | G   | T             |
| I00629      | GLI3   | c.2531T>A                                | p.Leu844His   | NM_000168.5    | Missense_Mutation      | 7   | 42006140  | 42006140  | A   | T             |
| I00630      | RNF43  | c.1976delG                               | p.Gly659fs    | NM_001305544.1 | Frame_Shift_Del        | 17  | 56435160  | 56435161  | AC  | -             |
| I00630      | MUC16  | c.40663_40664del<br>CCinsGT              | p.Pro13555Val | NM_024690.2    | Missense_Mutation      | 19  | 8999511   | 8999511   | G   | A             |
| I00630      | ZIC4   | c.1018C>T                                | p.Arg340Cys   | NM_001168378.1 | Missense_Mutation      | 3   | 147108854 | 147108854 | G   | A             |
| I00630      | PBRM1  | c.2223G>A                                | p.Pro741Pro   | NM_018313.4    | Silent                 | 3   | 52643673  | 52643673  | C   | T             |
| I00630      | PKHD1  | c.*280C>T                                |               | NM_170724.2    | 3'UTR                  | 6   | 51586504  | 51586504  | G   | A             |
| I00630      | KMT2C  | c.6341G>A                                | p.Arg2114Lys  | NM_170606.2    | Missense_Mutation      | 7   | 151878604 | 151878604 | C   | T             |
| I00630      | KMT2C  | c.3214C>T                                | p.Gln1072*    | NM_170606.2    | Nonsense_Mutation      | 7   | 151921209 | 151921209 | G   | A             |
| I00630      | KMT2C  | c.1012+76G>T                             |               | NM_170606.2    | Intron                 | 7   | 151970714 | 151970714 | C   | A             |
| I00630      | TRRAP  | c.5917-8G>A                              |               | NM_001244580.1 | Intron                 | 7   | 98553761  | 98553761  | G   | A             |
| I00631      | FAT4   | c.822G>A                                 | p.Ala274Ala   | NM_001291303.1 | Silent                 | 4   | 126238388 | 126238388 | G   | A             |
| I00631      | APC    | c.1409-60T>A                             |               | NM_000038.5    | Intron                 | 5   | 112162745 | 112162745 | T   | A             |
| I00631      | KMT2C  | c.8479_8480delCT                         | p.Leu2827fs   | NM_170606.2    | Frame_Shift_Del        | 7   | 151874057 | 151874059 | CAG | -             |
| I00632      | MACF1  | c.2785G>A                                | p.Ala929Thr   | NM_012090.5    | Missense_Mutation      | 1   | 39768731  | 39768731  | G   | A             |
| I00632      | MACF1  | c.10567G>A                               | p.Val3523Ile  | NM_012090.5    | Missense_Mutation      | 1   | 39893909  | 39893909  | G   | A             |
| I00632      | ERBB2  | c.648G>A                                 | p.Thr216Thr   | NM_004448.3    | Silent                 | 17  | 37866343  | 37866343  | G   | A             |
| I00632      | ERBB2  | c.*54G>A                                 |               | NM_001289938.1 | 3'UTR                  | 17  | 37873791  | 37873791  | G   | A             |
| I00632      | RNF43  | c.1976delG                               | p.Gly659fs    | NM_001305544.1 | Frame_Shift_Del        | 17  | 56435160  | 56435161  | AC  | -             |
| I00632      | MUC16  | c.28570G>A                               | p.Glu9524Lys  | NM_024690.2    | Missense_Mutation      | 19  | 9058876   | 9058876   | C   | T             |
| I00632      | MUC16  | c.15739A>C                               | p.Thr5247Pro  | NM_024690.2    | Missense_Mutation      | 19  | 9071707   | 9071707   | T   | G             |
| I00632      | ACVR2A | c.1310delA                               | p.Lys437fs    | NM_001278579.1 | Frame_Shift_Del        | 2   | 148683685 | 148683686 | TA  | -             |
| I00632      | EPHB1  | c.1733A>G                                | p.Lys578Arg   | NM_004441.4    | Missense_Mutation      | 3   | 134885822 | 134885822 | A   | G             |
| I00632      | APC    | c.3271C>T                                | p.Pro1091Ser  | NM_000038.5    | Missense_Mutation      | 5   | 112174562 | 112174562 | C   | T             |
| I00632      | APC    | c.7756dupA                               | p.Ser2586fs   | NM_000038.5    | Frame_Shift_Ins        | 5   | 112179042 | 112179043 | -   | CA            |
| I00632      | SYNE1  | c.10145+120_101<br>45+121insCCCTTC<br>CT |               | NM_182961.3    | Intron                 | 6   | 152685861 | 152685869 | -   | AAGGAA<br>GGG |
| I00632      | SYNE1  | c.8361G>A                                | p.Thr2787Thr  | NM_182961.3    | Silent                 | 6   | 152708333 | 152708333 | C   | T             |
| I00632      | PKHD1  | c.5236+22G>T                             |               | NM_138694.3    | Intron                 | 6   | 51889350  | 51889350  | C   | A             |
| I00632      | KMT2C  | c.10751G>T                               | p.Gly3584Val  | NM_170606.2    | Missense_Mutation      | 7   | 151859911 | 151859911 | C   | A             |
| I00632      | KMT2C  | c.5183G>A                                | p.Ser1728Asn  | NM_170606.2    | Missense_Mutation      | 7   | 151880141 | 151880141 | C   | T             |
| I00632      | KMT2C  | c.1012+13C>T                             |               | NM_170606.2    | Intron                 | 7   | 151970777 | 151970777 | G   | A             |
| I00632      | KMT2C  | c.850-17T>G                              |               | NM_170606.2    | Intron                 | 7   | 151970969 | 151970969 | A   | C             |
| I00632      | GLI3   | c.3098delC                               | p.Pro1033fs   | NM_000168.5    | Frame_Shift_Del        | 7   | 42005572  | 42005573  | CG  | -             |
| I00632      | GLI3   | c.1627G>A                                | p.Glu543Lys   | NM_000168.5    | Missense_Mutation      | 7   | 42018218  | 42018218  | C   | T             |
| I00632      | GLI3   | c.874C>T                                 | p.Arg292Cys   | NM_000168.5    | Missense_Mutation      | 7   | 42079791  | 42079791  | G   | A             |
| I00632      | PREX2  | c.2907A>G                                | p.Gln969Gln   | NM_025170.5    | Silent                 | 8   | 69017564  | 69017564  | A   | G             |
| I00633      | RNF43  | c.605T>A                                 | p.Leu202Gln   | NM_001305544.1 | Missense_Mutation      | 17  | 56439987  | 56439987  | A   | T             |
| I00633      | STK11  | c.595G>T                                 | p.Glu199*     | NM_000455.4    | Nonsense_Mutation      | 19  | 1220502   | 1220502   | G   | T             |
| I00633      | MUC16  | c.13179T>C                               | p.Pro4393Pro  | NM_024690.2    | Silent                 | 19  | 9074267   | 9074267   | A   | G             |
| I00633      | ZIC4   | c.839-918G>A                             |               | NM_001168378.1 | Intron                 | 3   | 147109951 | 147109951 | C   | T             |
| I00633      | FAT4   | c.12852C>T                               | p.Ser4284Ser  | NM_001291303.1 | Silent                 | 4   | 126408529 | 126408529 | C   | T             |
| I00633      | SYNE1  | c.15293+88G>A                            |               | NM_182961.3    | Intron                 | 6   | 152647343 | 152647343 | C   | T             |
| I00633      | RIMS2  | c.922A>G                                 | p.Ile308Val   | NM_001100117.2 | Missense_Mutation      | 8   | 104897749 | 104897749 | A   | G             |
| I00634      | MUC16  | c.11969C>A                               | p.Ala3990Glu  | NM_024690.2    | Missense_Mutation      | 19  | 9075477   | 9075477   | G   | T             |
| I00634      | FAT4   | c.12110T>G                               | p.Leu4037Arg  | NM_001291303.1 | Missense_Mutation      | 4   | 126389871 | 126389871 | T   | G             |
| I00636      | SPEN   | c.1697A>C                                | p.Gln566Pro   | NM_015001.2    | Missense_Mutation      | 1   | 16247426  | 16247426  | A   | C             |
| I00636      | MUC16  | c.40663_40664del<br>CCinsGT              | p.Pro13555Val | NM_024690.2    | Missense_Mutation      | 19  | 8999511   | 8999511   | G   | A             |
| I00636      | MUC16  | c.40644T>C                               | p.Asp13548Asp | NM_024690.2    | Silent                 | 19  | 8999531   | 8999531   | A   | G             |
| I00636      | KMT2C  | c.2968A>G                                | p.Ser990Gly   | NM_170606.2    | Missense_Mutation      | 7   | 151927016 | 151927016 | T   | C             |
| I00636      | KMT2C  | c.1005T>A                                | p.Pro335Pro   | NM_170606.2    | Silent                 | 7   | 151970797 | 151970797 | A   | T             |
| I00636      | KMT2C  | c.925C>T                                 | p.Pro309Ser   | NM_170606.2    | Missense_Mutation      | 7   | 151970877 | 151970877 | G   | A             |
| I00639      | APC    | c.784G>T                                 | p.Glu262*     | NM_000038.5    | Nonsense_Mutation      | 5   | 112137030 | 112137030 | G   | T             |
| I00639      | SYNE1  | c.2797G>T                                | p.Glu933*     | NM_182961.3    | Nonsense_Mutation      | 6   | 152776656 | 152776656 | C   | A             |
| I00642      | MUC16  | c.32425C>A                               | p.Arg10809Arg | NM_024690.2    | Silent                 | 19  | 9049206   | 9049206   | G   | T             |

|        |        |                |               |                |                   |    |           |           |    |    |
|--------|--------|----------------|---------------|----------------|-------------------|----|-----------|-----------|----|----|
| I00642 | APC    | c.4666dupA     | p.Thr1556fs   | NM_000038.5    | Frame_Shift_Ins   | 5  | 112175951 | 112175952 | -  | GA |
| I00642 | PKHD1  | c.10604A>C     | p.Tyr3535Ser  | NM_138694.3    | Missense_Mutation | 6  | 51524320  | 51524320  | T  | G  |
| I00642 | EGFR   | c.2380C>T      | p.Pro794Ser   | NM_005228.3    | Missense_Mutation | 7  | 55249082  | 55249082  | C  | T  |
| I00642 | RIMS2  | c.1625-177>G   |               | NM_001100117.2 | Intron            | 8  | 104922345 | 104922345 | T  | G  |
| I00643 | MUC16  | c.40611-16A>C  |               | NM_024690.2    | Intron            | 19 | 8999580   | 8999580   | T  | G  |
| I00644 | SYNE1  | c.24642+47A>G  |               | NM_182961.3    | Intron            | 6  | 152470565 | 152470565 | T  | C  |
| I00644 | PKHD1  | c.3729G>A      | p.Thr1243Thr  | NM_138694.3    | Silent            | 6  | 51890879  | 51890879  | C  | T  |
| I00644 | PREX2  | c.*4T>G        |               | NM_025170.5    | 3'UTR             | 8  | 69017601  | 69017601  | T  | G  |
| I00645 | TP53   | c.467delG      | p.Arg156fs    | NM_000546.5    | Frame_Shift_Del   | 17 | 7578462   | 7578463   | GC | -  |
| I00645 | MUC16  | c.40734C>T     | p.Ile13578Ile | NM_024690.2    | Silent            | 19 | 8999441   | 8999441   | G  | A  |
| I00645 | MUC16  | c.40732A>G     | p.Ile13578Val | NM_024690.2    | Missense_Mutation | 19 | 8999443   | 8999443   | T  | C  |
| I00645 | MUC16  | c.40713G>A     | p.Leu13571Leu | NM_024690.2    | Silent            | 19 | 8999462   | 8999462   | C  | T  |
| I00645 | MUC16  | c.40707G>C     | p.Trp13569Cys | NM_024690.2    | Missense_Mutation | 19 | 8999468   | 8999468   | C  | G  |
| I00645 | SYNE1  | c.18012+58G>T  |               | NM_182961.3    | Intron            | 6  | 152614665 | 152614665 | C  | A  |
| I00645 | SYNE1  | c.17635T>G     | p.Cys5879Gly  | NM_182961.3    | Missense_Mutation | 6  | 152621823 | 152621823 | A  | C  |
| I00645 | KMT2C  | c.1012+76G>T   |               | NM_170606.2    | Intron            | 7  | 151970714 | 151970714 | C  | A  |
| I00646 | MUC16  | c.20153T>A     | p.Ile6718Asn  | NM_024690.2    | Missense_Mutation | 19 | 9067293   | 9067293   | A  | T  |
| I00646 | SYNE1  | c.15336G>T     | p.Glu5112Asp  | NM_182961.3    | Missense_Mutation | 6  | 152647195 | 152647195 | C  | A  |
| I00646 | RIMS2  | c.1288A>G      | p.Asn430Asp   | NM_001100117.2 | Missense_Mutation | 8  | 104898115 | 104898115 | A  | G  |
| I00647 | ARID1A | c.2296delC     | p.Gln766fs    | NM_006015.4    | Frame_Shift_Del   | 1  | 27088681  | 27088682  | TC | -  |
| I00647 | MACF1  | c.5765G>A      | p.Arg1922Gln  | NM_012090.5    | Missense_Mutation | 1  | 39824376  | 39824376  | G  | A  |
| I00647 | ATM    | c.4110-33C>T   |               | NM_000051.3    | Intron            | 11 | 108159671 | 108159671 | C  | T  |
| I00647 | RNF43  | c.469C>T       | p.Leu157Leu   | NM_001305544.1 | Silent            | 17 | 56440749  | 56440749  | G  | A  |
| I00647 | EPHB1  | c.2025C>T      | p.Phe675Phe   | NM_004441.4    | Silent            | 3  | 134911560 | 134911560 | C  | T  |
| I00647 | ZIC4   | c.839-791G>A   |               | NM_001168378.1 | Intron            | 3  | 147109824 | 147109824 | C  | T  |
| I00647 | ZIC4   | c.839-812C>A   |               | NM_001168378.1 | Intron            | 3  | 147109845 | 147109845 | G  | T  |
| I00647 | MLH1   | c.37G>A        | p.Glu13Lys    | NM_000249.3    | Missense_Mutation | 3  | 37035075  | 37035075  | G  | A  |
| I00647 | FAT4   | c.7T>C         | p.Leu3Leu     | NM_001291303.1 | Silent            | 4  | 126237573 | 126237573 | T  | C  |
| I00647 | SYNE1  | c.15438+15C>T  |               | NM_182961.3    | Intron            | 6  | 152647078 | 152647078 | G  | A  |
| I00647 | SYNE1  | c.9408C>T      | p.Thr3136Thr  | NM_182961.3    | Silent            | 6  | 152694271 | 152694271 | G  | A  |
| I00647 | PKHD1  | c.3804C>T      | p.Ala1268Ala  | NM_138694.3    | Silent            | 6  | 51890804  | 51890804  | G  | A  |
| I00647 | KMT2C  | c.14404G>A     | p.Gly4802Arg  | NM_170606.2    | Missense_Mutation | 7  | 151836816 | 151836816 | C  | T  |
| I00647 | KMT2C  | c.3323+62delA  |               | NM_170606.2    | Intron            | 7  | 151921037 | 151921037 | GT | G  |
| I00647 | KMT2C  | c.1012+103T>G  |               | NM_170606.2    | Intron            | 7  | 151970687 | 151970687 | A  | C  |
| I00647 | GLI3   | c.3556C>T      | p.Pro1186Ser  | NM_000168.5    | Missense_Mutation | 7  | 42005115  | 42005115  | G  | A  |
| I00647 | GLI3   | c.2234A>C      | p.Asp745Ala   | NM_000168.5    | Missense_Mutation | 7  | 42007391  | 42007391  | T  | G  |
| I00647 | TRRAP  | c.1160G>A      | p.Arg387His   | NM_001244580.1 | Missense_Mutation | 7  | 98506395  | 98506395  | G  | A  |
| I00647 | TRRAP  | c.3508C>T      | p.Arg1170Trp  | NM_001244580.1 | Missense_Mutation | 7  | 98528370  | 98528370  | C  | T  |
| I00647 | TRRAP  | c.11328C>T     | p.Asp3776Asp  | NM_001244580.1 | Silent            | 7  | 98609726  | 98609726  | C  | T  |
| I00647 | RIMS2  | c.592G>C       | p.Val198Leu   | NM_001100117.2 | Missense_Mutation | 8  | 104778659 | 104778659 | G  | C  |
| I00647 | PREX2  | c.141+79G>A    |               | NM_024870.3    | Intron            | 8  | 68864849  | 68864849  | G  | A  |
| I00647 | PREX2  | c.1610T>C      | p.Val537Ala   | NM_024870.3    | Missense_Mutation | 8  | 68989672  | 68989672  | T  | C  |
| I00648 | ARID1A | c.437delC      | p.Pro146fs    | NM_006015.4    | Frame_Shift_Del   | 1  | 27023326  | 27023327  | GC | -  |
| I00648 | ARID1A | c.2402delG     | p.Gly801fs    | NM_006015.4    | Frame_Shift_Del   | 1  | 27088787  | 27088788  | AG | -  |
| I00648 | ARID1A | c.5000C>T      | p.Pro1667Leu  | NM_006015.4    | Missense_Mutation | 1  | 27102074  | 27102074  | C  | T  |
| I00648 | MACF1  | c.1696C>T      | p.Arg566*     | NM_012090.5    | Nonsense_Mutation | 1  | 39753130  | 39753130  | C  | T  |
| I00648 | CCND1  | c.683G>A       | p.Arg228His   | NM_053056.2    | Missense_Mutation | 11 | 69462870  | 69462870  | G  | A  |
| I00648 | ERBB2  | c.1022-118T>C  |               | NM_004448.3    | Intron            | 17 | 37868457  | 37868457  | T  | C  |
| I00648 | RNF43  | c.1976delG     | p.Gly659fs    | NM_001305544.1 | Frame_Shift_Del   | 17 | 56435160  | 56435161  | AC | -  |
| I00648 | STK11  | c.1108+1409G>A |               | NM_000455.4    | Intron            | 19 | 1224580   | 1224580   | G  | A  |
| I00648 | MUC16  | c.34881A>G     | p.Ile11627Met | NM_024690.2    | Missense_Mutation | 19 | 9046750   | 9046750   | T  | C  |
| I00648 | MUC16  | c.19605G>A     | p.Pro6535Pro  | NM_024690.2    | Silent            | 19 | 9067841   | 9067841   | C  | T  |
| I00648 | ZIC4   | c.839-1119C>T  |               | NM_001168378.1 | Intron            | 3  | 147110152 | 147110152 | G  | A  |
| I00648 | CTNNB1 | c.1255T>C      | p.Cys419Arg   | NM_001098209.1 | Missense_Mutation | 3  | 41275089  | 41275089  | T  | C  |
| I00648 | PBRM1  | c.1726delC     | p.Arg576fs    | NM_018313.4    | Frame_Shift_Del   | 3  | 52651369  | 52651370  | CG | -  |
| I00648 | FAT4   | c.536G>A       | p.Gly179Asp   | NM_001291303.1 | Missense_Mutation | 4  | 126238102 | 126238102 | G  | A  |
| I00648 | FAT1   | c.2440G>A      | p.Asp814Asn   | NM_005245.3    | Missense_Mutation | 4  | 187628542 | 187628542 | C  | T  |
| I00648 | SYNE1  | c.8276C>A      | p.Pro2759His  | NM_182961.3    | Missense_Mutation | 6  | 152708418 | 152708418 | G  | T  |
| I00648 | SYNE1  | c.2091C>T      | p.Val697Val   | NM_182961.3    | Silent            | 6  | 152784494 | 152784494 | G  | A  |
| I00648 | KMT2C  | c.10683T>G     | p.Pro3561Pro  | NM_170606.2    | Silent            | 7  | 151859979 | 151859979 | A  | C  |
| I00648 | RIMS2  | c.99delT       | p.Phe33fs     | NM_001282881.1 | Frame_Shift_Del   | 8  | 104831829 | 104831830 | CT | -  |
| I00648 | PREX2  | c.*117A>G      |               | NM_025170.5    | 3'UTR             | 8  | 69017714  | 69017714  | A  | G  |
| I00649 | TP53   | c.586C>T       | p.Arg196*     | NM_000546.5    | Nonsense_Mutation | 17 | 7578263   | 7578263   | G  | A  |
| I00649 | ACVR2A | c.886A>G       | p.Met296Val   | NM_001278579.1 | Missense_Mutation | 2  | 148676085 | 148676085 | A  | G  |
| I00649 | KMT2C  | c.2976+31T>C   |               | NM_170606.2    | Intron            | 7  | 151926977 | 151926977 | A  | G  |
| I00649 | KMT2C  | c.1012+80G>T   |               | NM_170606.2    | Intron            | 7  | 151970710 | 151970710 | C  | A  |

|        |        |                |               |                |                   |    |           |           |    |   |
|--------|--------|----------------|---------------|----------------|-------------------|----|-----------|-----------|----|---|
| I00649 | KMT2C  | c.850-63C>T    |               | NM_170606.2    | Intron            | 7  | 151971015 | 151971015 | G  | A |
| I00649 | PREX2  | c.4775+31G>A   |               | NM_024870.3    | Intron            | 8  | 69136892  | 69136892  | G  | A |
| I00650 | SPEN   | c.6313delG     | p.Ala2105fs   | NM_015001.2    | Frame_Shift_Del   | 1  | 16259042  | 16259043  | AG | - |
| I00650 | ARID1A | c.437delC      | p.Pro146fs    | NM_006015.4    | Frame_Shift_Del   | 1  | 27023326  | 27023327  | GC | - |
| I00650 | ARID1A | c.1015delG     | p.Ala339fs    | NM_006015.4    | Frame_Shift_Del   | 1  | 27023903  | 27023904  | TG | - |
| I00650 | ARID1A | c.2420-84A>G   |               | NM_006015.4    | Intron            | 1  | 27089380  | 27089380  | A  | G |
| I00650 | MACF1  | c.4629+5595G>A |               | NM_012090.5    | Intron            | 1  | 39798620  | 39798620  | G  | A |
| I00650 | ATM    | c.8922G>A      | p.Pro2974Pro  | NM_000051.3    | Silent            | 11 | 108235880 | 108235880 | G  | A |
| I00650 | RNF43  | c.1976delG     | p.Gly659fs    | NM_001305544.1 | Frame_Shift_Del   | 17 | 56435160  | 56435161  | AC | - |
| I00650 | TP53   | c.637C>T       | p.Arg213*     | NM_000546.5    | Nonsense_Mutation | 17 | 7578212   | 7578212   | G  | A |
| I00650 | MUC16  | c.23886T>C     | p.Pro7962Pro  | NM_024690.2    | Silent            | 19 | 9063560   | 9063560   | A  | G |
| I00650 | ACVR2A | c.1310delA     | p.Lys437fs    | NM_001278579.1 | Frame_Shift_Del   | 2  | 148683685 | 148683686 | TA | - |
| I00650 | EPHB1  | c.568C>T       | p.Arg190Cys   | NM_004441.4    | Missense_Mutation | 3  | 134670657 | 134670657 | C  | T |
| I00650 | ZIC4   | c.839-1052G>A  |               | NM_001168378.1 | Intron            | 3  | 147110085 | 147110085 | C  | T |
| I00650 | PBRM1  | c.2128C>T      | p.Arg710*     | NM_018313.4    | Nonsense_Mutation | 3  | 52643768  | 52643768  | G  | A |
| I00650 | FAT1   | c.13727C>T     | p.Thr4576Met  | NM_005245.3    | Missense_Mutation | 4  | 187509786 | 187509786 | G  | A |
| I00650 | SYNE1  | c.8358C>A      | p.His2786Gln  | NM_182961.3    | Missense_Mutation | 6  | 152708336 | 152708336 | G  | T |
| I00650 | PKHD1  | c.9278G>A      | p.Gly3093Asp  | NM_138694.3    | Missense_Mutation | 6  | 51613136  | 51613136  | C  | T |
| I00650 | PKHD1  | c.1311G>A      | p.Trp437*     | NM_138694.3    | Nonsense_Mutation | 6  | 51923322  | 51923322  | C  | T |
| I00650 | RIMS2  | c.741C>T       | p.Tyr247Tyr   | NM_001100117.2 | Silent            | 8  | 104897568 | 104897568 | C  | T |
| I00651 | PTEN   | c.1030C>T      | p.Gln344*     | NM_001304717.2 | Nonsense_Mutation | 10 | 89711893  | 89711893  | C  | T |
| I00651 | MUC16  | c.3517A>C      | p.Thr1173Pro  | NM_024690.2    | Missense_Mutation | 19 | 9088298   | 9088298   | T  | G |
| I00651 | RHOA   | c.385C>T       | p.Arg129Trp   | NM_001313941.1 | Missense_Mutation | 3  | 49399952  | 49399952  | G  | A |
| I00651 | RHOA   | c.170T>C       | p.Leu57Ser    | NM_001313941.1 | Missense_Mutation | 3  | 49405968  | 49405968  | A  | G |
| I00651 | SYNE1  | c.24313-104G>A |               | NM_182961.3    | Intron            | 6  | 152472929 | 152472929 | C  | T |
| I00651 | KMT2C  | c.1012+95T>A   |               | NM_170606.2    | Intron            | 7  | 151970695 | 151970695 | A  | T |
| I00651 | RIMS2  | c.-208G>T      |               | NM_001282881.1 | 5'UTR             | 8  | 104831528 | 104831528 | G  | T |
| I00652 | TP53   | c.578A>G       | p.His193Arg   | NM_000546.5    | Missense_Mutation | 17 | 7578271   | 7578271   | T  | C |
| I00652 | MUC16  | c.38202+64G>T  |               | NM_024690.2    | Intron            | 19 | 9015557   | 9015557   | C  | A |
| I00652 | MUC16  | c.36795+100T>G |               | NM_024690.2    | Intron            | 19 | 9026091   | 9026091   | A  | C |
| I00652 | MUC16  | c.8708A>G      | p.Lys2903Arg  | NM_024690.2    | Missense_Mutation | 19 | 9083107   | 9083107   | T  | C |
| I00652 | KMT2C  | c.1012+76G>T   |               | NM_170606.2    | Intron            | 7  | 151970714 | 151970714 | C  | A |
| I00653 | PTEN   | c.956delT      | p.Leu319fs    | NM_001304717.2 | Frame_Shift_Del   | 10 | 89692948  | 89692949  | AT | - |
| I00653 | ERBB2  | c.689C>T       | p.Pro230Leu   | NM_004448.3    | Missense_Mutation | 17 | 37866384  | 37866384  | C  | T |
| I00653 | MUC16  | c.41476-90C>T  |               | NM_024690.2    | Intron            | 19 | 8994299   | 8994299   | G  | A |
| I00653 | ERBB4  | c.235-37C>A    |               | NM_005235.2    | Intron            | 2  | 212812378 | 212812378 | G  | T |
| I00653 | EPHB1  | c.125G>T       | p.Trp42Leu    | NM_004441.4    | Missense_Mutation | 3  | 134670214 | 134670214 | G  | T |
| I00653 | PIK3CA | c.813+19A>G    |               | NM_006218.3    | Intron            | 3  | 178919347 | 178919347 | A  | G |
| I00653 | APC    | c.5065A>G      | p.Thr1689Ala  | NM_000038.5    | Missense_Mutation | 5  | 112176356 | 112176356 | A  | G |
| I00653 | SYNE1  | c.23658C>T     | p.Ala7886Ala  | NM_182961.3    | Silent            | 6  | 152485430 | 152485430 | G  | A |
| I00653 | SYNE1  | c.9801A>C      | p.Leu3267Phe  | NM_182961.3    | Missense_Mutation | 6  | 152690113 | 152690113 | T  | G |
| I00653 | SYNE1  | c.1330C>T      | p.Arg444Trp   | NM_182961.3    | Missense_Mutation | 6  | 152804240 | 152804240 | G  | A |
| I00653 | PKHD1  | c.6332+56A>G   |               | NM_138694.3    | Intron            | 6  | 51777108  | 51777108  | T  | C |
| I00653 | KMT2C  | c.1469+59T>G   |               | NM_170606.2    | Intron            | 7  | 151949572 | 151949572 | A  | C |
| I00653 | EGFR   | c.1789G>T      | p.Ala597Ser   | NM_005228.3    | Missense_Mutation | 7  | 55233039  | 55233039  | G  | T |
| I00653 | TRRAP  | c.483T>G       | p.Ile161Met   | NM_001244580.1 | Missense_Mutation | 7  | 98493419  | 98493419  | T  | G |
| I00653 | RIMS2  | c.3682A>G      | p.Thr1228Ala  | NM_001100117.2 | Missense_Mutation | 8  | 105261807 | 105261807 | A  | G |
| I00654 | MACF1  | c.4629+5734T>C |               | NM_012090.5    | Intron            | 1  | 39798759  | 39798759  | T  | C |
| I00654 | CDH1   | c.1051C>T      | p.Gln351*     | NM_004360.4    | Nonsense_Mutation | 16 | 68846080  | 68846080  | C  | T |
| I00654 | SYNE1  | c.17541+51G>A  |               | NM_182961.3    | Intron            | 6  | 152622953 | 152622953 | C  | T |
| I00657 | SPEN   | c.7015C>T      | p.Arg2339Cys  | NM_015001.2    | Missense_Mutation | 1  | 16259750  | 16259750  | C  | T |
| I00657 | ARID1A | c.110delG      | p.Gly37fs     | NM_006015.4    | Frame_Shift_Del   | 1  | 27022998  | 27022999  | CG | - |
| I00657 | ARID1A | c.3794G>T      | p.Gly1265Val  | NM_006015.4    | Missense_Mutation | 1  | 27099915  | 27099915  | G  | T |
| I00657 | ARID1A | c.5236delG     | p.Asp1746fs   | NM_006015.4    | Frame_Shift_Del   | 1  | 27105623  | 27105624  | TG | - |
| I00657 | ARID1A | c.5548delG     | p.Asp1850fs   | NM_006015.4    | Frame_Shift_Del   | 1  | 27105930  | 27105931  | TG | - |
| I00657 | ATM    | c.400G>T       | p.Gly134Cys   | NM_000051.3    | Missense_Mutation | 11 | 108106465 | 108106465 | G  | T |
| I00657 | KRAS   | c.35G>A        | p.Gly12Asp    | NM_033360.3    | Missense_Mutation | 12 | 25398284  | 25398284  | C  | T |
| I00657 | CDH1   | c.1321-35G>A   |               | NM_004360.4    | Intron            | 16 | 68849383  | 68849383  | G  | A |
| I00657 | CDH1   | c.1779delC     | p.Ile594fs    | NM_004360.4    | Frame_Shift_Del   | 16 | 68855966  | 68855967  | GC | - |
| I00657 | MUC16  | c.39045C>A     | p.Leu13015Leu | NM_024690.2    | Silent            | 19 | 9009681   | 9009681   | G  | T |
| I00657 | MUC16  | c.39036G>A     | p.Pro13012Pro | NM_024690.2    | Silent            | 19 | 9009690   | 9009690   | C  | T |
| I00657 | ACVR2A | c.1310delA     | p.Lys437fs    | NM_001278579.1 | Frame_Shift_Del   | 2  | 148683685 | 148683686 | TA | - |
| I00657 | ERBB4  | c.695G>A       | p.Arg232Gln   | NM_005235.2    | Missense_Mutation | 2  | 212589847 | 212589847 | C  | T |
| I00657 | EPHB1  | c.1526G>A      | p.Arg509His   | NM_004441.4    | Missense_Mutation | 3  | 134880963 | 134880963 | G  | A |
| I00657 | ZIC4   | c.565G>A       | p.Ala189Thr   | NM_001168378.1 | Missense_Mutation | 3  | 147113912 | 147113912 | C  | T |
| I00657 | MLH1   | c.1558+1G>A    |               | NM_000249.3    | Intron            | 3  | 37070424  | 37070424  | G  | A |

|               |       |                |               |                |                   |    |           |           |   |   |
|---------------|-------|----------------|---------------|----------------|-------------------|----|-----------|-----------|---|---|
| <b>I00657</b> | FAT1  | c.10293C>T     | p.Ser3431Ser  | NM_005245.3    | Silent            | 4  | 187527281 | 187527281 | G | A |
| <b>I00657</b> | FAT1  | c.9456C>T      | p.Ala3152Ala  | NM_005245.3    | Silent            | 4  | 187534270 | 187534270 | G | A |
| <b>I00657</b> | SYNE1 | c.25286T>C     | p.Leu8429Ser  | NM_182961.3    | Missense_Mutation | 6  | 152461257 | 152461257 | A | G |
| <b>I00657</b> | KMT2C | c.12308A>G     | p.Asp4103Gly  | NM_170606.2    | Missense_Mutation | 7  | 151850008 | 151850008 | T | C |
| <b>I00657</b> | TRRAP | c.9035-93T>C   |               | NM_001244580.1 | Intron            | 7  | 98581623  | 98581623  | T | C |
| <b>I00658</b> | TP53  | c.782+1G>A     |               | NM_000546.5    | Intron            | 17 | 7577498   | 7577498   | C | T |
| <b>I00658</b> | MUC16 | c.32776G>T     | p.Val10926Phe | NM_024690.2    | Missense_Mutation | 19 | 9048855   | 9048855   | C | A |
| <b>I00658</b> | EPHB1 | c.1223C>T      | p.Ala408Val   | NM_004441.4    | Missense_Mutation | 3  | 134851817 | 134851817 | C | T |
| <b>I00658</b> | FAT4  | c.10894G>A     | p.Gly3632Ser  | NM_001291303.1 | Missense_Mutation | 4  | 126373059 | 126373059 | G | A |
| <b>I00658</b> | SYNE1 | c.12226-109G>T |               | NM_182961.3    | Intron            | 6  | 152660610 | 152660610 | C | A |
