# Supplementary material for: Liquid Biopsy in Gastric Cancer: Analysis of Somatic Cancer Tissue Mutations in Plasma Cell-Free DNA for Predicting Disease State and Patient Survival
Source: PubMed Central journal article supplement (PMC8462609; doi:10.14309/ctg.0000000000000403), 2021-09-24
Supplement: ct9-12-e00403-s007.pdf [file ct9-12-e00403-s007.pdf]

**Supplementary table 5. Somatic variants in plasma cfDNA of GC patients**

| Sample name | Gene  | cHGVS         | pHGVS         | Transcript  | Variant classification | Chr | Start     | End       | REF | ALT |
|-------------|-------|---------------|---------------|-------------|------------------------|-----|-----------|-----------|-----|-----|
| I00629      | KMT2C | c.11670+68T>C |               | NM_170606.2 | Intron                 | 7   | 151855880 | 151855880 | A   | G   |
| I00629      | KMT2C | c.2961C>G     | p.Tyr987*     | NM_170606.2 | Nonsense_Mutation      | 7   | 151927023 | 151927023 | G   | C   |
| I00629      | KMT2C | c.2917A>G     | p.Arg973Gly   | NM_170606.2 | Missense_Mutation      | 7   | 151927067 | 151927067 | T   | C   |
| I00629      | KMT2C | c.2652+62A>G  |               | NM_170606.2 | Intron                 | 7   | 151935730 | 151935730 | T   | C   |
| I00629      | KMT2C | c.1017G>C     | p.Lys339Asn   | NM_170606.2 | Missense_Mutation      | 7   | 151962290 | 151962290 | C   | G   |
| I00629      | SYNE1 | c.10145+99C>T |               | NM_182961.3 | Intron                 | 6   | 152685883 | 152685883 | G   | A   |
| I00630      | KMT2C | c.5009-19C>T  |               | NM_170606.2 | Intron                 | 7   | 151882735 | 151882735 | G   | A   |
| I00630      | KMT2C | c.5009-59T>A  |               | NM_170606.2 | Intron                 | 7   | 151882775 | 151882775 | A   | T   |
| I00630      | KMT2C | c.2652+62A>G  |               | NM_170606.2 | Intron                 | 7   | 151935730 | 151935730 | T   | C   |
| I00630      | KMT2C | c.1012+76G>T  |               | NM_170606.2 | Intron                 | 7   | 151970714 | 151970714 | C   | A   |
| I00630      | MUC16 | c.42395+25C>T |               | NM_024690.2 | Intron                 | 19  | 8976556   | 8976556   | G   | A   |
| I00630      | MUC16 | c.40664C>T    | p.Pro13555Leu | NM_024690.2 | Missense_Mutation      | 19  | 8999511   | 8999511   | G   | A   |
| I00631      | KMT2C | c.5009-19C>T  |               | NM_170606.2 | Intron                 | 7   | 151882735 | 151882735 | G   | A   |
| I00631      | KMT2C | c.2961C>G     | p.Tyr987*     | NM_170606.2 | Nonsense_Mutation      | 7   | 151927023 | 151927023 | G   | C   |
| I00631      | KMT2C | c.2917A>G     | p.Arg973Gly   | NM_170606.2 | Missense_Mutation      | 7   | 151927067 | 151927067 | T   | C   |
| I00631      | KMT2C | c.2652+62A>G  |               | NM_170606.2 | Intron                 | 7   | 151935730 | 151935730 | T   | C   |
| I00631      | MUC16 | c.36568+19G>A |               | NM_024690.2 | Intron                 | 19  | 9028205   | 9028205   | C   | T   |
| I00631      | MUC16 | c.36568+10T>C |               | NM_024690.2 | Intron                 | 19  | 9028214   | 9028214   | A   | G   |
| I00632      | KMT2C | c.5009-19C>T  |               | NM_170606.2 | Intron                 | 7   | 151882735 | 151882735 | G   | A   |
| I00632      | KMT2C | c.5009-59T>A  |               | NM_170606.2 | Intron                 | 7   | 151882775 | 151882775 | A   | T   |
| I00632      | KMT2C | c.2652+62A>G  |               | NM_170606.2 | Intron                 | 7   | 151935730 | 151935730 | T   | C   |
| I00632      | KMT2C | c.1012+13C>T  |               | NM_170606.2 | Intron                 | 7   | 151970777 | 151970777 | G   | A   |
| I00632      | KMT2C | c.850-17T>G   |               | NM_170606.2 | Intron                 | 7   | 151970969 | 151970969 | A   | C   |
| I00633      | KMT2C | c.5009-19C>T  |               | NM_170606.2 | Intron                 | 7   | 151882735 | 151882735 | G   | A   |
| I00633      | KMT2C | c.5009-59T>A  |               | NM_170606.2 | Intron                 | 7   | 151882775 | 151882775 | A   | T   |
| I00633      | KMT2C | c.2652+62A>G  |               | NM_170606.2 | Intron                 | 7   | 151935730 | 151935730 | T   | C   |
| I00634      | KMT2C | c.5009-19C>T  |               | NM_170606.2 | Intron                 | 7   | 151882735 | 151882735 | G   | A   |
| I00634      | KMT2C | c.5009-59T>A  |               | NM_170606.2 | Intron                 | 7   | 151882775 | 151882775 | A   | T   |
| I00634      | KMT2C | c.2652+62A>G  |               | NM_170606.2 | Intron                 | 7   | 151935730 | 151935730 | T   | C   |
| I00634      | MUC16 | c.39206+28T>C |               | NM_024690.2 | Intron                 | 19  | 9009239   | 9009239   | A   | G   |
| I00634      | MUC16 | c.39206+23A>G |               | NM_024690.2 | Intron                 | 19  | 9009244   | 9009244   | T   | C   |
| I00636      | KMT2C | c.5068A>C     | p.Arg1690Arg  | NM_170606.2 | Silent                 | 7   | 151882657 | 151882657 | T   | G   |
| I00636      | KMT2C | c.2968A>G     | p.Ser990Gly   | NM_170606.2 | Missense_Mutation      | 7   | 151927016 | 151927016 | T   | C   |
| I00636      | KMT2C | c.1005T>A     | p.Pro335Pro   | NM_170606.2 | Silent                 | 7   | 151970797 | 151970797 | A   | T   |
| I00636      | KMT2C | c.925C>T      | p.Pro309Ser   | NM_170606.2 | Missense_Mutation      | 7   | 151970877 | 151970877 | G   | A   |
| I00636      | MUC16 | c.40664C>T    | p.Pro13555Leu | NM_024690.2 | Missense_Mutation      | 19  | 8999511   | 8999511   | G   | A   |
| I00636      | MUC16 | c.40644T>C    | p.Asp13548Asp | NM_024690.2 | Silent                 | 19  | 8999531   | 8999531   | A   | G   |
| I00638      | KMT2C | c.5009-19C>T  |               | NM_170606.2 | Intron                 | 7   | 151882735 | 151882735 | G   | A   |
| I00638      | KMT2C | c.2652+62A>G  |               | NM_170606.2 | Intron                 | 7   | 151935730 | 151935730 | T   | C   |
| I00638      | KMT2C | c.2418C>G     | p.Ser806Ser   | NM_170606.2 | Silent                 | 7   | 151945101 | 151945101 | G   | C   |
| I00639      | KMT2C | c.5009-19C>T  |               | NM_170606.2 | Intron                 | 7   | 151882735 | 151882735 | G   | A   |
| I00639      | KMT2C | c.5009-59T>A  |               | NM_170606.2 | Intron                 | 7   | 151882775 | 151882775 | A   | T   |
| I00639      | KMT2C | c.2652+62A>G  |               | NM_170606.2 | Intron                 | 7   | 151935730 | 151935730 | T   | C   |
| I00642      | MACF1 | c.14695G>T    | p.Ala4899Ser  | NM_012090.5 | Missense_Mutation      | 1   | 39919508  | 39919508  | G   | T   |
| I00643      | KMT2C | c.5009-19C>T  |               | NM_170606.2 | Intron                 | 7   | 151882735 | 151882735 | G   | A   |
| I00643      | KMT2C | c.5009-59T>A  |               | NM_170606.2 | Intron                 | 7   | 151882775 | 151882775 | A   | T   |
| I00643      | KMT2C | c.2652+62A>G  |               | NM_170606.2 | Intron                 | 7   | 151935730 | 151935730 | T   | C   |
| I00643      | MUC16 | c.40611-16A>C |               | NM_024690.2 | Intron                 | 19  | 8999580   | 8999580   | T   | G   |
| I00645      | KMT2C | c.5009-19C>T  |               | NM_170606.2 | Intron                 | 7   | 151882735 | 151882735 | G   | A   |
| I00645      | KMT2C | c.5009-59T>A  |               | NM_170606.2 | Intron                 | 7   | 151882775 | 151882775 | A   | T   |
| I00645      | KMT2C | c.1012+76G>T  |               | NM_170606.2 | Intron                 | 7   | 151970714 | 151970714 | C   | A   |
| I00645      | MUC16 | c.40734C>T    | p.Ile13578Ile | NM_024690.2 | Silent                 | 19  | 8999441   | 8999441   | G   | A   |
| I00645      | MUC16 | c.40732A>G    | p.Ile13578Val | NM_024690.2 | Missense_Mutation      | 19  | 8999443   | 8999443   | T   | C   |
| I00645      | MUC16 | c.40713G>A    | p.Leu13571Leu | NM_024690.2 | Silent                 | 19  | 8999462   | 8999462   | C   | T   |
| I00645      | MUC16 | c.40707G>C    | p.Trp13569Cys | NM_024690.2 | Missense_Mutation      | 19  | 8999468   | 8999468   | C   | G   |
| I00645      | TP53  | c.467delG     | p.Arg156fs    | NM_000546.5 | Frame_Shift_Del        | 17  | 7578462   | 7578463   | GC  | -   |
| I00647      | KMT2C | c.5009-59T>A  |               | NM_170606.2 | Intron                 | 7   | 151882775 | 151882775 | A   | T   |
| I00647      | KMT2C | c.2961C>G     | p.Tyr987*     | NM_170606.2 | Intron                 | 7   | 151921037 | 151921037 | G   | T   |
| I00647      | KMT2C | c.2917A>G     | p.Arg973Gly   | NM_170606.2 | Nonsense_Mutation      | 7   | 151927023 | 151927023 | G   | C   |
| I00647      | KMT2C | c.2652+62A>G  |               | NM_170606.2 | Missense_Mutation      | 7   | 151927067 | 151927067 | T   | C   |
| I00647      | KMT2C | c.1012+103T>G |               | NM_170606.2 | Intron                 | 7   | 151935730 | 151935730 | T   | C   |

|        |        |                               |               |                |                   |    |           |           |    |    |
|--------|--------|-------------------------------|---------------|----------------|-------------------|----|-----------|-----------|----|----|
| I00647 | KMT2C  | c.3323+63C>A                  |               | NM_170606.2    | Intron            | 7  | 151970687 | 151970687 | A  | C  |
| I00647 | MUC16  | c.38577C>A                    | p.Leu12859Leu | NM_024690.2    | Silent            | 19 | 9012867   | 9012867   | G  | T  |
| I00648 | KMT2C  | c.5009-19C>T                  |               | NM_170606.2    | Intron            | 7  | 151882735 | 151882735 | G  | A  |
| I00648 | KMT2C  | c.5009-59T>A                  |               | NM_170606.2    | Intron            | 7  | 151882775 | 151882775 | A  | T  |
| I00648 | KMT2C  | c.2769+5G>T                   |               | NM_170606.2    | Intron            | 7  | 151932897 | 151932897 | C  | A  |
| I00648 | KMT2C  | c.2652+62A>G                  |               | NM_170606.2    | Intron            | 7  | 151935730 | 151935730 | T  | C  |
| I00648 | MUC16  | c.37195C>T                    | p.Leu12399Leu | NM_024690.2    | Silent            | 19 | 9021128   | 9021128   | G  | A  |
| I00649 | KMT2C  | c.5009-19C>T                  |               | NM_170606.2    | Intron            | 7  | 151882735 | 151882735 | G  | A  |
| I00649 | KMT2C  | c.5009-59T>A                  |               | NM_170606.2    | Intron            | 7  | 151882775 | 151882775 | A  | T  |
| I00649 | KMT2C  | c.2769+83A>T                  |               | NM_170606.2    | Intron            | 7  | 151926977 | 151926977 | A  | G  |
| I00649 | KMT2C  | c.2652+62A>G                  |               | NM_170606.2    | Intron            | 7  | 151932819 | 151932819 | T  | A  |
| I00649 | KMT2C  | c.1184+61T>C                  |               | NM_170606.2    | Intron            | 7  | 151935730 | 151935730 | T  | C  |
| I00649 | KMT2C  | c.1012+80G>T                  |               | NM_170606.2    | Intron            | 7  | 151962062 | 151962062 | A  | G  |
| I00649 | KMT2C  | c.850-63C>T                   |               | NM_170606.2    | Intron            | 7  | 151970710 | 151970710 | C  | A  |
| I00649 | KMT2C  | c.2976+31T>C                  |               | NM_170606.2    | Intron            | 7  | 151971015 | 151971015 | G  | A  |
| I00649 | MUC16  | c.38948-7T>C                  |               | NM_024690.2    | Intron            | 19 | 9010720   | 9010720   | A  | G  |
| I00650 | KMT2C  | c.2652+62A>G                  |               | NM_170606.2    | Intron            | 7  | 151935730 | 151935730 | T  | C  |
| I00651 | KMT2C  | c.5009-19C>T                  |               | NM_170606.2    | Intron            | 7  | 151882735 | 151882735 | G  | A  |
| I00651 | KMT2C  | c.5009-59T>A                  |               | NM_170606.2    | Intron            | 7  | 151882775 | 151882775 | A  | T  |
| I00651 | KMT2C  | c.1012+95T>A                  |               | NM_170606.2    | Intron            | 7  | 151970695 | 151970695 | A  | T  |
| I00652 | KMT2C  | c.5009-19C>T                  |               | NM_170606.2    | Intron            | 7  | 151882735 | 151882735 | G  | A  |
| I00652 | KMT2C  | c.1012+76G>T                  |               | NM_170606.2    | Intron            | 7  | 151970714 | 151970714 | C  | A  |
| I00653 | KMT2C  | c.5009-19C>T                  |               | NM_170606.2    | Intron            | 7  | 151882735 | 151882735 | G  | A  |
| I00653 | KMT2C  | c.2961C>G                     | p.Tyr987*     | NM_170606.2    | Nonsense_Mutation | 7  | 151927023 | 151927023 | G  | C  |
| I00653 | KMT2C  | c.2917A>G                     | p.Arg973Gly   | NM_170606.2    | Missense_Mutation | 7  | 151927067 | 151927067 | T  | C  |
| I00653 | KMT2C  | c.2755G>C                     | p.Val919Leu   | NM_170606.2    | Missense_Mutation | 7  | 151932916 | 151932916 | C  | G  |
| I00653 | KMT2C  | c.2652+62A>G                  |               | NM_170606.2    | Intron            | 7  | 151935730 | 151935730 | T  | C  |
| I00657 | ACVR2A | c.1310delA                    | p.Lys437fs    | NM_001278579.1 | Frame_Shift_Del   | 2  | 148683685 | 148683686 | TA | -  |
| I00657 | ERBB4  | c.695G>A                      | p.Arg232Gln   | NM_005235.2    | Missense_Mutation | 2  | 212589847 | 212589847 | C  | T  |
| I00657 | FAT1   | c.10293C>T                    | p.Ser3431Ser  | NM_005245.3    | Silent            | 4  | 187527281 | 187527281 | G  | A  |
| I00657 | KMT2C  | c.5009-19C>T                  |               | NM_170606.2    | Missense_Mutation | 7  | 151850008 | 151850008 | T  | C  |
| I00657 | KMT2C  | c.5009-59T>A                  |               | NM_170606.2    | Intron            | 7  | 151882735 | 151882735 | G  | A  |
| I00657 | KMT2C  | c.2769+83A>T                  |               | NM_170606.2    | Intron            | 7  | 151882775 | 151882775 | A  | T  |
| I00657 | KMT2C  | c.2652+62A>G                  |               | NM_170606.2    | Intron            | 7  | 151932819 | 151932819 | T  | A  |
| I00657 | KMT2C  | c.12308A>G                    | p.Asp4103Gly  | NM_170606.2    | Intron            | 7  | 151935730 | 151935730 | T  | C  |
| I00657 | MLH1   | c.1558+1G>A                   |               | NM_000249.3    | Intron            | 3  | 37070424  | 37070424  | G  | A  |
| I00657 | MUC16  | c.39045C>A                    | p.Leu13015Leu | NM_024690.2    | Silent            | 19 | 9009681   | 9009681   | G  | T  |
| I00657 | MUC16  | c.39036G>A                    | p.Pro13012Pro | NM_024690.2    | Silent            | 19 | 9009690   | 9009690   | C  | T  |
| I00657 | PREX2  | c.4605-27C>T                  |               | NM_024870.3    | Intron            | 8  | 69129824  | 69129824  | C  | T  |
| I00657 | SPEN   | c.7015C>T                     | p.Arg2339Cys  | NM_015001.2    | Missense_Mutation | 1  | 16259750  | 16259750  | C  | T  |
| I00657 | SYNE1  | c.25286T>C                    | p.Leu8429Ser  | NM_182961.3    | Missense_Mutation | 6  | 152461257 | 152461257 | A  | G  |
| I00658 | FAT4   | c.10894G>A                    | p.Gly3632Ser  | NM_001291303.1 | Missense_Mutation | 4  | 126373059 | 126373059 | G  | A  |
| I00658 | KMT2C  | c.2652+62A>G                  |               | NM_170606.2    | Intron            | 7  | 151935730 | 151935730 | T  | C  |
| I00658 | KMT2C  | c.2533-102G>T                 |               | NM_170606.2    | Intron            | 7  | 151936013 | 151936013 | C  | A  |
| I00658 | KMT2C  | c.1017G>C                     | p.Lys339Asn   | NM_170606.2    | Missense_Mutation | 7  | 151962290 | 151962290 | C  | G  |
| I00658 | MUC16  | c.39206+39C>A                 |               | NM_024690.2    | Intron            | 19 | 9009228   | 9009228   | G  | T  |
| I00658 | MUC16  | c.37547-8T>C                  |               | NM_024690.2    | Intron            | 19 | 9009349   | 9009349   | C  | G  |
| I00658 | MUC16  | c.37547-13_37547-12delCAinsAG |               | NM_024690.2    | Intron            | 19 | 9019348   | 9019348   | A  | G  |
| I00658 | MUC16  | c.39139-15G>C                 |               | NM_024690.2    | Intron            | 19 | 9019352   | 9019352   | TG | CT |
| I00658 | PKHD1  | c.729A>G                      | p.Ala243Ala   | NM_138694.3    | Silent            | 6  | 51934304  | 51934304  | T  | C  |
| I00658 | SYNE1  | c.10145+42A>G                 |               | NM_182961.3    | Intron            | 6  | 152660610 | 152660610 | C  | A  |
| I00658 | SYNE1  | c.12226-109G>T                |               | NM_182961.3    | Intron            | 6  | 152685940 | 152685940 | T  | C  |
| I00658 | TP53   | c.782+1G>A                    |               | NM_000546.5    | Intron            | 17 | 7577498   | 7577498   | C  | T  |

<sup>1</sup> Variants in *KMT2C* that were recurrently called in many samples could be potential false-positives despite UMI-based error correction, e.g. c.2652+62A>G, c.5009-59T>A, c.5009-19C>T.
