# Supplementary material for: Liquid Biopsy in Gastric Cancer: Analysis of Somatic Cancer Tissue Mutations in Plasma Cell-Free DNA for Predicting Disease State and Patient Survival
Source: PubMed Central journal article supplement (PMC8462609; doi:10.14309/ctg.0000000000000403), 2021-09-24
Supplement: ct9-12-e00403-s008.pdf [file ct9-12-e00403-s008.pdf]

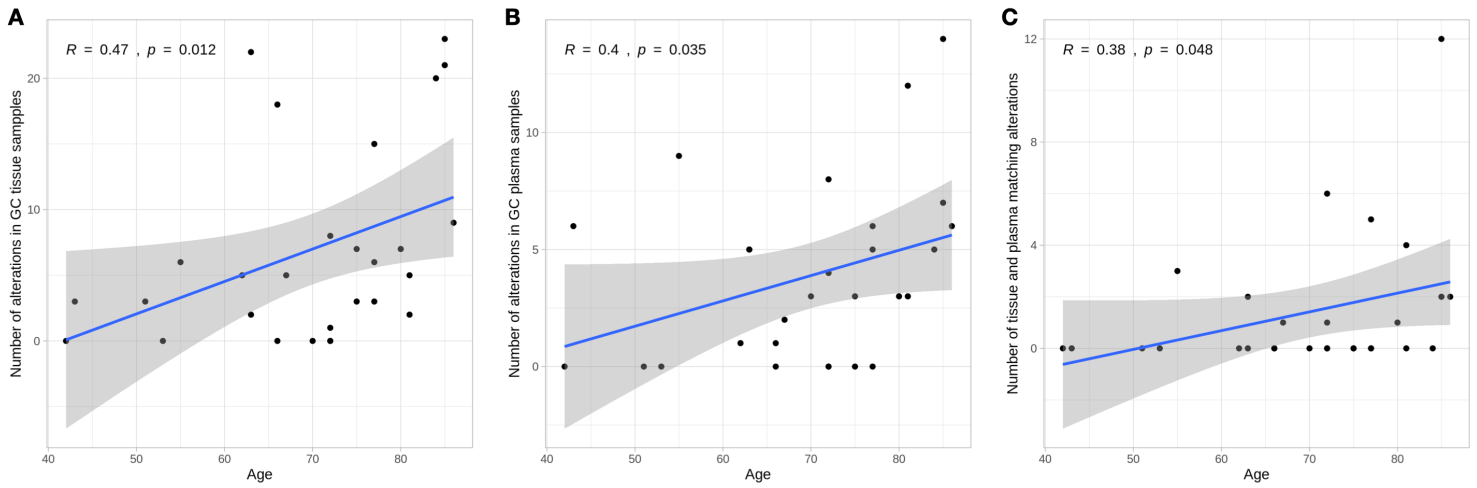

**Supplementary Figure 4.** Spearman's correlation analysis between the quantity of alterations with patients' age **a** in tissue samples; **b** plasma samples; and **c** tissue and plasma matching variants. The quantity of unique somatic alterations detected in tissue, plasma and the quantity of tissue matching alterations in plasma revealed positive moderate correlation with age ( $R = 0.47$ ,  $p = 0.012$ ;  $R = 0.4$ ,  $p$ -value =  $0.035$ ;  $R = 0.38$ ,  $p = 0.048$ , respectively)
